# Supplementary material for: Smart photopharmacological agents: LaVO4:Eu3+@vinyl phosphonate combining luminescence imaging and photoswitchable butyrylcholinesterase inhibition
Source: Royal Society of Chemistry journal article supplement (doi:10.1039/d4na00389f), 2024-01-01
Supplement: d4na00389f1.pdf [file d4na00389f1.pdf]

## Supporting Information

### Smart photopharmacological agents: LaVO<sub>4</sub>:Eu<sup>3+</sup>@Vinyl Phosphonate combining luminescence imaging and photoswitchable butyrylcholinesterase inhibition

Gulia Bikbaeva<sup>1</sup>, Anna Pilip<sup>2</sup>, Anastasiya Egorova<sup>3</sup>, Vasily Medvedev<sup>1</sup>, Daria Mamonova<sup>1</sup>,  
Dmitrii Pankin<sup>1</sup>, Alexey Kalinichev<sup>1</sup>, Natalya Mayachkina<sup>2</sup>, Lyudmila Bakina<sup>2</sup>,  
Ilya Kolesnikov<sup>1</sup>, Gerd Leuchs<sup>4\*</sup>, Alina Manshina<sup>1\*</sup>

<sup>1</sup> St. Petersburg state university, 7-9 Universitetskaya Embankment, St Petersburg, 199034, Russia

<sup>2</sup> St. Petersburg Federal Research Center of the Russian Academy of Sciences (SPC RAS) Scientific Research Centre for Ecological Safety of the Russian Academy of Sciences, Korpusnaya 18, St. Petersburg, 197110, Russia

<sup>3</sup> St. Petersburg State Technological Institute (Technical University), 26, Moskovski ave., St. Petersburg, 190013, Russia

<sup>4</sup> Max Planck Institute for the Science of Light, Erlangen, 91058, Germany

\* [a.manshina@spbu.ru](mailto:a.manshina@spbu.ru), [gerd.leuchs@mpl.mpg.de](mailto:gerd.leuchs@mpl.mpg.de)

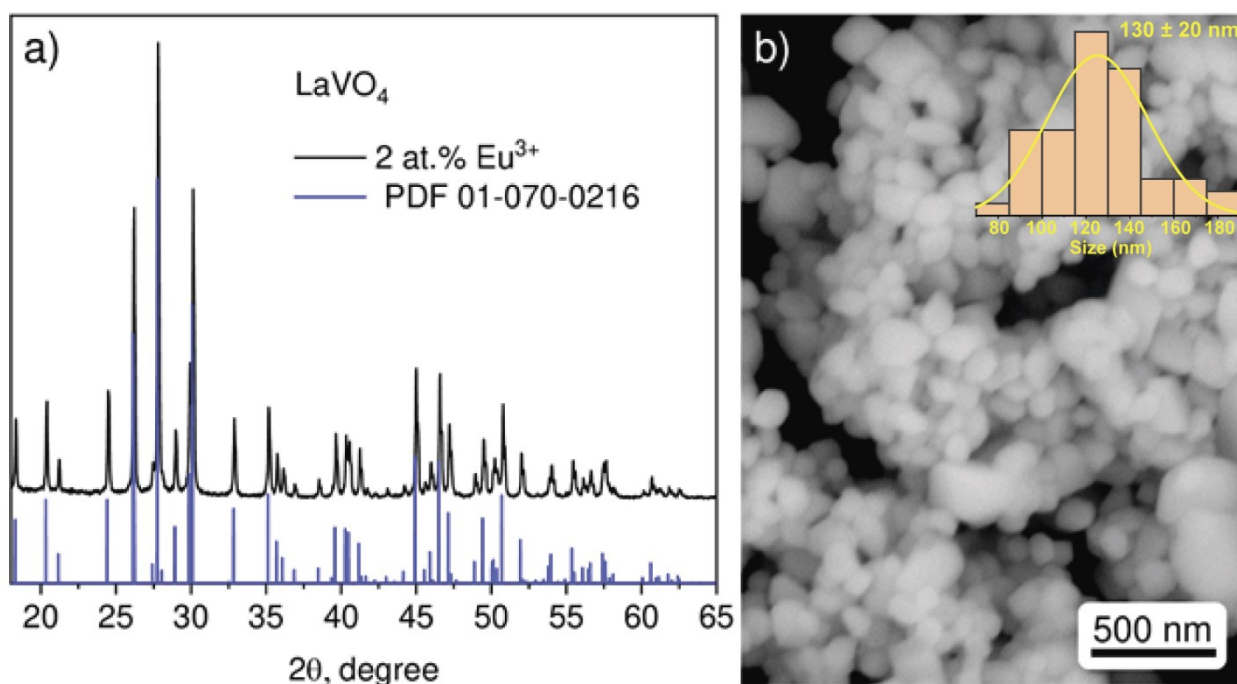

Fig. S1 a) XRD patterns for LaVO<sub>4</sub>:Eu<sup>3+</sup> 2 at.% particles and standard PDF-card of LaVO<sub>4</sub> (01-070-0216); b) SEM image of LaVO<sub>4</sub>:Eu<sup>3+</sup> 2 at.% particles.

#### *Luminescence characterization of NPs LaVO<sub>4</sub>:Eu<sup>3+</sup>*

Figure S2 show excitation (red) and emission (black) spectra of the LaVO<sub>4</sub>:Eu<sup>3+</sup> 2 at.% nanocrystalline powder. Excitation spectrum measured for <sup>5</sup>D<sub>0</sub>-<sup>7</sup>F<sub>2</sub> transition ( $\lambda_{em} = 615$  nm) is dominated by a strong broad charge transfer band (CTB) situated in the UV range. CTB corresponds to the charge transfer in the VO<sub>4</sub><sup>3-</sup> group<sup>1</sup>. Additionally, a series of sharp lines at longer wavelengths attributed to 4f-4f transitions inside Eu<sup>3+</sup> ions was observed: <sup>7</sup>F<sub>0</sub>-<sup>5</sup>L<sub>7</sub> (380 nm),

${}^7F_0-{}^5L_6$  (393 nm),  ${}^7F_0-{}^5D_3$  (412 nm), and  ${}^7F_0-{}^5D_2$  (463 nm). Emission spectrum obtained upon 318 nm excitation consists of narrow peaks, which is assigned to the following transitions:  ${}^5D_1-{}^7F_0$  (525 nm),  ${}^5D_1-{}^7F_1$  (532 and 537 nm),  ${}^5D_1-{}^7F_2$  (554 nm),  ${}^5D_0-{}^7F_0$  (578 nm),  ${}^5D_0-{}^7F_1$  (587 and 594 nm),  ${}^5D_0-{}^7F_2$  (615 nm),  ${}^5D_0-{}^7F_3$  (651 nm), and  ${}^5D_0-{}^7F_4$  (688 and 699 nm)<sup>2,3</sup>. The most prominent peak corresponds to the forced electric dipole  ${}^5D_0-{}^7F_2$  transition, which suggests the absence of inversion symmetry at the  $\text{Eu}^{3+}$  lattice site in the  $\text{LaVO}_4$  host.

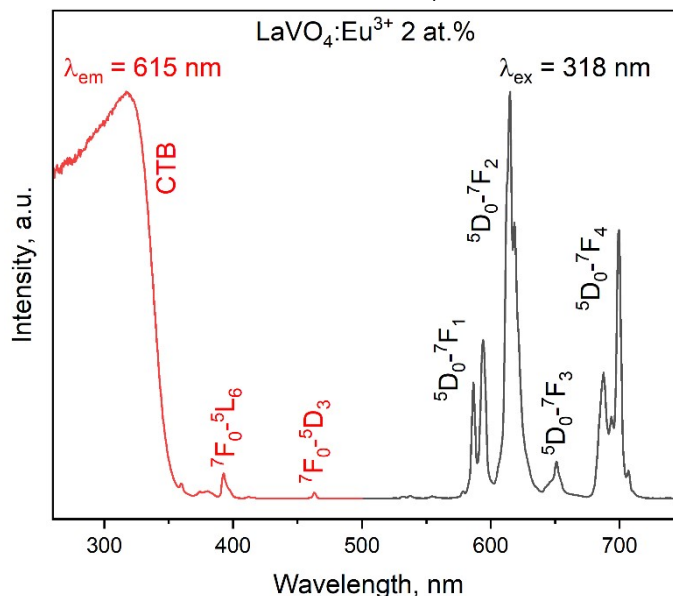

Fig. S2. Excitation (red) and emission (black) spectra of the  $\text{LaVO}_4:\text{Eu}^{3+}$  2 at.% nanocrystalline powder.

## References

- 1 I. E. Kolesnikov, D. V. Mamonova, M. A. Kurochkin, V. A. Medvedev and E. Y. Kolesnikov, *Ceram. Int.*, 2023, **49**, 20699–20705.
- 2 P. Serna-Gallén, H. Beltrán-Mir and E. Cordoncillo, *Ceram. Int.*, 2023, **49**, 41078–41089.
- 3 W.-W. Park, P. K. Olshin, Y.-J. Kim, H.-W. Nho, D. V. Mamonova, I. E. Kolesnikov, V. A. Medvedev and O.-H. Kwon, *ACS Nano*, 2024, **18**, 4911–4921.
